# Supplementary material
Source: Springer Nature journal article supplement (https://www.springermedizin.de/resource/supplementary/13054_2012_2088_MOESM2_ESM.pdf/9711936)
Supplement: MOESM2 [file 9711936]

| CLASS                               | GFR CRITERIA                                                                                                            | URINARY OUTPUT CRITERIA                      |
|-------------------------------------|-------------------------------------------------------------------------------------------------------------------------|----------------------------------------------|
| RISK                                | Serum creatinine $\times 1.5$ or GFR decrease $>25\%$                                                                   | $<0.5$ ml/kg/h $\times 6$ h                  |
| INJURY                              | Serum creatinine $\times 2$ or GFR decrease $>50\%$                                                                     | $<0.5$ ml/kg/h $\times 12$ h                 |
| FAILURE                             | Serum creatinine $\times 3$ , or GFR decrease $>75\%$<br>Serum creatinine $\geq 4$ mg/d with an acute rise $>0.5$ mg/dl | $<0.3$ ml/kg/h $\times 24$ h, or anuria 12 h |
| LOSS<br>END-STAGE<br>KIDNEY DISEASE | Persistent acute renal failure = complete loss of kidney function $>4$ weeks<br>End-stage kidney disease $>3$ months    |                                              |
